# Supplementary material for: An efficient synthesis of loline alkaloids
Source: Springer Nature journal article supplement (doi:10.1038/nchem.1072), 2011-06-17
Supplement: 41557_2011_BFnchem1072_MOESM23_ESM.mol [file 41557_2011_BFnchem1072_MOESM23_ESM.mol]

  ChemDraw06011107052D

 24 26  0  0  0  0  0  0  0  0999 V2000
   -0.5318    1.8035    0.0000 C   0  0  0  0  0  0  0  0  0  0  0  0
   -0.5318    0.9785    0.0000 C   0  0  0  0  0  0  0  0  0  0  0  0
    0.0515    0.3952    0.0000 N   0  0  0  0  0  0  0  0  0  0  0  0
    0.8765    0.3952    0.0000 C   0  0  0  0  0  0  0  0  0  0  0  0
    1.4599    0.9785    0.0000 C   0  0  0  0  0  0  0  0  0  0  0  0
    1.4599    1.8035    0.0000 C   0  0  0  0  0  0  0  0  0  0  0  0
    0.8765    2.3869    0.0000 C   0  0  0  0  0  0  0  0  0  0  0  0
    0.0515    2.3869    0.0000 C   0  0  0  0  0  0  0  0  0  0  0  0
    2.2445    0.7236    0.0000 O   0  0  0  0  0  0  0  0  0  0  0  0
    2.2445    2.0585    0.0000 O   0  0  0  0  0  0  0  0  0  0  0  0
    1.4599    2.6285    0.0000 H   0  0  0  0  0  0  0  0  0  0  0  0
    1.4599    0.1535    0.0000 H   0  0  0  0  0  0  0  0  0  0  0  0
    2.7294    1.3910    0.0000 S   0  0  0  0  0  0  0  0  0  0  0  0
    3.5517    1.3910    0.0000 O   0  0  0  0  0  0  0  0  0  0  0  0
   -3.3388   -1.2529    0.0000 C   0  0  0  0  0  0  0  0  0  0  0  0
   -3.5517   -2.0471    0.0000 C   0  0  0  0  0  0  0  0  0  0  0  0
   -2.9702   -2.6285    0.0000 C   0  0  0  0  0  0  0  0  0  0  0  0
   -2.1760   -2.4157    0.0000 C   0  0  0  0  0  0  0  0  0  0  0  0
   -1.9632   -1.6215    0.0000 C   0  0  0  0  0  0  0  0  0  0  0  0
   -2.5446   -1.0401    0.0000 C   0  0  0  0  0  0  0  0  0  0  0  0
   -1.1690   -1.4087    0.0000 C   0  0  0  0  0  0  0  0  0  0  0  0
   -0.9562   -0.6145    0.0000 O   0  0  0  0  0  0  0  0  0  0  0  0
   -0.1620   -0.4017    0.0000 C   0  0  0  0  0  0  0  0  0  0  0  0
    0.4194   -0.9831    0.0000 O   0  0  0  0  0  0  0  0  0  0  0  0
  1  2  1  0      
  2  3  1  0      
  3  4  1  0      
  4  5  1  0      
  5  6  1  0      
  6  7  1  0      
  7  8  2  0      
  8  1  1  0      
  3 23  1  0      
  5  9  1  0      
  9 13  1  0      
 13 10  1  0      
 10  6  1  0      
  6 11  1  1      
  5 12  1  1      
 13 14  2  0      
 15 16  2  0      
 16 17  1  0      
 17 18  2  0      
 18 19  1  0      
 19 20  2  0      
 15 20  1  0      
 19 21  1  0      
 21 22  1  0      
 22 23  1  0      
 23 24  2  0      
M  END
