# Supplementary material for: An efficient synthesis of loline alkaloids
Source: Springer Nature journal article supplement (doi:10.1038/nchem.1072), 2011-06-17
Supplement: 41557_2011_BFnchem1072_MOESM25_ESM.mol [file 41557_2011_BFnchem1072_MOESM25_ESM.mol]

  ChemDraw06011107052D

 22 23  0  0  0  0  0  0  0  0999 V2000
   -0.5571    1.9309    0.0000 C   0  0  0  0  0  0  0  0  0  0  0  0
   -0.5571    1.1031    0.0000 C   0  0  0  0  0  0  0  0  0  0  0  0
    0.0282    0.5177    0.0000 N   0  0  0  0  0  0  0  0  0  0  0  0
    0.8560    0.5177    0.0000 C   0  0  0  0  0  0  0  0  0  0  0  0
    1.4413    1.1031    0.0000 C   0  0  0  0  0  0  0  0  0  0  0  0
    1.4413    1.9309    0.0000 C   0  0  0  0  0  0  0  0  0  0  0  0
    0.8560    2.5162    0.0000 C   0  0  0  0  0  0  0  0  0  0  0  0
    0.0282    2.5162    0.0000 C   0  0  0  0  0  0  0  0  0  0  0  0
    2.1582    0.6892    0.0000 O   0  0  0  0  0  0  0  0  0  0  0  0
   -3.3736   -1.1359    0.0000 C   0  0  0  0  0  0  0  0  0  0  0  0
   -3.5871   -1.9328    0.0000 C   0  0  0  0  0  0  0  0  0  0  0  0
   -3.0038   -2.5162    0.0000 C   0  0  0  0  0  0  0  0  0  0  0  0
   -2.2069   -2.3027    0.0000 C   0  0  0  0  0  0  0  0  0  0  0  0
   -1.9934   -1.5058    0.0000 C   0  0  0  0  0  0  0  0  0  0  0  0
   -2.5767   -0.9224    0.0000 C   0  0  0  0  0  0  0  0  0  0  0  0
   -1.1965   -1.2923    0.0000 C   0  0  0  0  0  0  0  0  0  0  0  0
   -0.9829   -0.4954    0.0000 O   0  0  0  0  0  0  0  0  0  0  0  0
   -0.1861   -0.2818    0.0000 C   0  0  0  0  0  0  0  0  0  0  0  0
    0.3973   -0.8652    0.0000 O   0  0  0  0  0  0  0  0  0  0  0  0
    2.1582    2.3448    0.0000 N   0  0  0  0  0  0  0  0  0  0  0  0
    2.8727    1.9323    0.0000 N   0  3  0  0  0  0  0  0  0  0  0  0
    3.5871    1.5198    0.0000 N   0  5  0  0  0  0  0  0  0  0  0  0
  1  2  1  0      
  2  3  1  0      
  3  4  1  0      
  4  5  1  0      
  5  6  1  0      
  6  7  1  0      
  7  8  2  0      
  8  1  1  0      
  3 18  1  0      
  5  9  1  6      
  6 20  1  1      
 10 11  2  0      
 11 12  1  0      
 12 13  2  0      
 13 14  1  0      
 14 15  2  0      
 10 15  1  0      
 14 16  1  0      
 16 17  1  0      
 17 18  1  0      
 18 19  2  0      
 20 21  2  0      
 21 22  2  0      
M  CHG  2  21   1  22  -1
M  END
