# Supplementary material for: An efficient synthesis of loline alkaloids
Source: Springer Nature journal article supplement (doi:10.1038/nchem.1072), 2011-06-17
Supplement: 41557_2011_BFnchem1072_MOESM32_ESM.mol [file 41557_2011_BFnchem1072_MOESM32_ESM.mol]

  ChemDraw06011107052D

 15 17  0  0  0  0  0  0  0  0999 V2000
   -1.4597    0.3996    0.0000 O   0  0  0  0  0  0  0  0  0  0  0  0
   -1.4448   -0.4253    0.0000 C   0  0  0  0  0  0  0  0  0  0  0  0
   -0.7231   -0.8249    0.0000 C   0  0  0  0  0  0  0  0  0  0  0  0
   -0.0161   -0.3996    0.0000 N   0  0  0  0  0  0  0  0  0  0  0  0
   -0.0309    0.4252    0.0000 C   0  0  0  0  0  0  0  0  0  0  0  0
   -0.7527    0.8248    0.0000 C   0  0  0  0  0  0  0  0  0  0  0  0
   -0.3721    0.0616    0.0000 C   0  0  0  0  0  0  0  0  0  0  0  0
   -1.2737   -1.2486    0.0000 C   0  0  0  0  0  0  0  0  0  0  0  0
   -0.1936   -1.2526    0.0000 C   0  0  0  0  0  0  0  0  0  0  0  0
   -0.7361    1.6497    0.0000 H   0  0  0  0  0  0  0  0  0  0  0  0
   -2.2178   -0.7137    0.0000 H   0  0  0  0  0  0  0  0  0  0  0  0
   -0.7035   -1.6497    0.0000 H   0  0  0  0  0  0  0  0  0  0  0  0
    0.5733    0.0974    0.0000 N   0  0  0  0  0  0  0  0  0  0  0  0
    1.3956    0.0995    0.0000 N   0  3  0  0  0  0  0  0  0  0  0  0
    2.2178    0.1017    0.0000 N   0  5  0  0  0  0  0  0  0  0  0  0
  1  2  1  0      
  2  3  1  0      
  3  4  1  0      
  4  5  1  0      
  5  6  1  0      
  6  1  1  0      
  6  7  1  0      
  3  7  1  0      
  2  8  1  0      
  4  9  1  0      
  8  9  1  0      
  7 13  1  6      
  6 10  1  1      
  2 11  1  1      
  3 12  1  1      
 13 14  2  0      
 14 15  2  0      
M  CHG  2  14   1  15  -1
M  END
